# Supplementary material
Source: Research Square preprint supplement (doi:10.21203/rs.3.rs-9257747/v1)
Supplement: Supplementary file 1 [file a671db4f25974c79305049a2.docx]

**Supplementary Table S1.** Compositional differences between control and OSCC patients at different taxonomic levels according to the results of four different algorithms.

|  | **Phyla** | **Families** | **Genera** | **Species** |
| --- | --- | --- | --- | --- |
| **MaAsLin2** | - | Tannerellaceae | *Tannerella  Solobacterium  Bergeyella  Dialister* | *Fusobacterium simiae  Haemophilus haemolyticus  Tannerella forsythia  Lachnoanaerobaculum umeaense  Solobacterium moorei  Prevotella nigrescens  Haemophilus influenzae  Streptococcus mitis  Dialister pneumosintes  Veillonella tobetsuensis  Kingella denitrificans* |
| **ANCOMBC2** | Pseudomonadota  Bacillota | Tannerellaceae  Weeksellaceae  Erysipelotrichaceae  Flavobacteriaceae | *Tannerella  Dialister  Bergeyella* | *Prevotella nigrescens* |
| **LinDA** | Pseudomonadota  Bacillota | Tannerellaceae  Erysipelotrichaceae  Weeksellaceae | *Tannerella  Dialister  Leptotrichia* | *Prevotella nigrescens* |
| **ALDEx2** | - | Tannerellaceae | *Tannerella* | *-* |
